# Supplementary material for: Collective cell mechanics of epithelial shells with organoid-like morphologies
Source: PubMed Central journal article supplement (PMC7393134; doi:10.1038/s41467-020-17535-4), 2020-07-30
Supplement: 41467_2020_17535_MOESM7_ESM.pdf [file 41467_2020_17535_MOESM7_ESM.pdf]

## Description of Additional Supplementary Files

File Name: Supplementary Movie 1

Description: Evolution of shapes of the three model epithelial shells in Fig. 1c of the main text without active T1 transitions ( $k_{T1}^{(0)} = 0$ ),  $N_c = 300$ , and  $v_{\text{lumen}} = 100$ . The simulations start from a spherical shape and result in a spherical ( $\alpha = 1.2$ ,  $\beta = 1.2$ ), stomatocyte ( $\alpha = 0.5$ ,  $\beta = 1.1$ ), and budded ( $\alpha = 1.5$ ,  $\beta = 0.3$ ) morphology.

File Name: Supplementary Movie 2

Description: Evolution of shapes of the four active T1 model epithelial shells in Fig. 1d of the main text, with  $k_{T1}^{(0)} = 200$ ,  $N_c = 300$ , and  $v_{\text{lumen}} = 100$ . The simulations start from a spherical shape and result in a spherical ( $\alpha = 1.2$ ,  $\beta = 1.2$ ), stomatocyte ( $\alpha = 0.5$ ,  $\beta = 1.1$ ), budded ( $\alpha = 1.1$ ,  $\beta = 0.5$ ), and branched ( $\alpha = 0.7$ ,  $\beta = 0.5$ ) morphology.

File Name: Supplementary Movie 3

Description: Evolution of the branched model epithelial shell in Fig. 2d of the main text ( $\alpha = 0.7$ ,  $\beta = 0.5$ ). Cells with five neighbors are colored yellow, cells with seven neighbors are colored brown, and all other cells are white.

File Name: Supplementary Movie 4

Description: Evolution of shapes of the four growing model epithelial shells with  $\tau_d = 2000$  in Figs. 4b-e of the main text. Note that while in the spherical ( $\alpha = 1.2$ ,  $\beta = 1.2$ ), stomatocyte ( $\alpha = 0.5$ ,  $\beta = 1.1$ ), budded ( $\alpha = 1.1$ ,  $\beta = 0.5$ ) epithelial shells the shapes resulting from growth and from junctional activity (Fig. 1d of the main text) belong to the same category, the ( $\alpha = 0.7$ ,  $\beta = 0.5$ ) growth-induced shape differs from the branched morphology in Fig. 1d as branching requires the presence of active T1 transitions, which are absent in the growing-shell model. u

File Name: Supplementary Movie 5

Description: Evolution of shapes of the two growing model epithelial shells with  $\tau_d = 2000$  in Figs. 4f-g of the main text with ( $\alpha = 0.7$ ,  $\beta = 0.5$ ), without active T1 transitions ( $k_{T1}^{(0)} = 0$ ; left), and with active T1 transitions ( $k_{T1}^{(0)} = 200$ ; right).
